# Supplementary material
Source: HighWire-hosted journal article supplement (https://bmjopen.bmj.com/content/14/6/e080434)
Supplement: inline-supplementary-material-1 [file inline-supplementary-material-1.pdf]

Table 1: Socio-Demographic Characteristics of Study Participants

| Characteristics                                 | Health care providers (N=9) | Clients (N=13) |
|-------------------------------------------------|-----------------------------|----------------|
| <b>Sex, No (%)</b>                              |                             |                |
| <b>Male</b>                                     | 3(33)                       | 2(15)          |
| <b>Female</b>                                   | 6(67)                       | 11(85)         |
|                                                 |                             |                |
| <b>Age (years), No (%)</b>                      |                             |                |
| <b>18-24</b>                                    | 0(0)                        | 0(0)           |
| <b>25-34</b>                                    | 4(44)                       | 0(0)           |
| <b>35-44</b>                                    | 0(0)                        | 5(38)          |
| <b>45-55</b>                                    | 3(33)                       | 4(31)          |
| <b>&gt;55</b>                                   | 5(23)                       | 4(31)          |
|                                                 |                             |                |
| <b>Level of education, No (%)</b>               |                             |                |
| <b>Primary</b>                                  | 2(22)                       | 12(92)         |
| <b>Secondary</b>                                | 4(45)                       | 1(8)           |
| <b>College/University</b>                       | 3(33)                       | 0(0)           |
|                                                 |                             |                |
| <b>Client's Occupation Status, No (%)</b>       |                             |                |
| <b>Employed</b>                                 |                             | 2(15)          |
| <b>Business</b>                                 |                             | 9(70)          |
| <b>Farmer</b>                                   |                             | 2(15)          |
| <b>Others specify</b>                           |                             | 0(0)           |
|                                                 |                             |                |
| <b>Clients' duration on ART (years), No (%)</b> |                             |                |
| <b>0-5</b>                                      |                             | 3(24)          |
| <b>6-10</b>                                     |                             | 6(46)          |
| <b>11-15</b>                                    |                             | 2(15)          |
| <b>&gt;15</b>                                   |                             | 2(15)          |
|                                                 |                             |                |
| <b>Provider Cadres, No (%)</b>                  |                             |                |
| <b>Clinician</b>                                | 4(45)                       |                |
| <b>ART Nurse</b>                                | 2(22)                       |                |
| <b>Pharmacist</b>                               | 1(11)                       |                |
| <b>Community Health Worker</b>                  | 2(22)                       |                |
|                                                 |                             |                |
| <b>Work experience at CTC (years), No (%)</b>   |                             |                |
| <b>&lt;1</b>                                    | 3(34)                       |                |
| <b>2-3</b>                                      | 4(44)                       |                |
| <b>4-5</b>                                      | 2(22)                       |                |

Table 2: Identified Main Themes and Sub-Themes Related to MMD Uptake

| Themes                                                  | Sub-themes              | Codes                                                                                                                                                                                                                                                                                            |
|---------------------------------------------------------|-------------------------|--------------------------------------------------------------------------------------------------------------------------------------------------------------------------------------------------------------------------------------------------------------------------------------------------|
| <b>Facilitators to the optimum uptake of MMD of ART</b> | Health system factors   | Policy and guidelines enable the uptake of MMD.<br>Stakeholders support on MMD uptake                                                                                                                                                                                                            |
|                                                         | Health facility factors | Service providers' ability to identify eligible clients for MMD and quality improvement uptake.<br>Ongoing Health Care Providers' moral support to PLHIV.<br>Fast track services of MMD clients<br>Timely collection of HIV Viral load facilitates MMD uptake                                    |
|                                                         | Individual factors      | Client's satisfaction/pleasure from MMD service<br>Little interference with client's socio-economic activities<br>Peer clients' motivation increases the uptake of MMD<br>Increasing client's demand for MMD<br>Travel costs reduction<br>Clients' awareness on MMD and its eligibility criteria |
| <b>Barriers to the optimum uptake of MMD of ART</b>     | Health facility factors | Inadequate drug supply of ARVs in the facilities<br>Prolonged turn-around time of HVL results<br>Delayed TPT initiation<br>Staff shortage at CTC                                                                                                                                                 |
|                                                         | Individual factors      | Self and community stigma hinder MMD uptake<br>Missing appointments and Interruption in treatment                                                                                                                                                                                                |
